# Supplementary material for: Fabrication, Potentiometric Characterization, and Application of Screen-Printed RuO2 pH Electrodes for Water Quality Testing
Source: MDPI journal article supplement (doi:10.3390/s21165399), 2021-08-10
Supplement: s1 [file s1]

## Supplementary Material

**Table S1.** Summary of RuO<sub>2</sub> based pH electrode characteristics reported previously and in this work

| Deposition method | Electrode sensitive material                     | Substrate                          | Precursor                                                        | Slope, mV/pH | E <sup>0</sup> , mV | R <sup>2</sup> | pH range          | Response time, s | T, °C     | Hysteresis, mV    | Drift, mV/h | Reference electrode    | Ref.              |
|-------------------|--------------------------------------------------|------------------------------------|------------------------------------------------------------------|--------------|---------------------|----------------|-------------------|------------------|-----------|-------------------|-------------|------------------------|-------------------|
| ED <sup>1</sup>   | RuO <sub>2</sub>                                 | Au wire                            | K <sub>2</sub> RuO <sub>4</sub>                                  | 59.3         | 521                 | N/A            | 2.0 - 12.0        | N/A              | N/A       | N/A               | N/A         | NHE <sup>2</sup>       | [1]               |
|                   |                                                  | Au disk                            | RuCl <sub>3</sub> ·xH <sub>2</sub> O                             | 60.5         | N/A                 | 0.999          | 2.0 – 11.0        | 7                | N/A       | N/A               | N/A         |                        | [2]               |
|                   |                                                  | Pt                                 | RuO <sub>2</sub>                                                 | 56.2         | 596                 | 0.999          | 4.0 - 10.0        | N/A              | 37.5      | N/A               | N/A         | Ag AgCl KCl            | [3]               |
|                   |                                                  | Pt-Ti                              | RuO <sub>2</sub>                                                 | 59.3         | 609                 | 0.999          | 4.0 - 10.0        | N/A              | 37.5      | N/A               | N/A         |                        | [3]               |
| Screen-printing   | RuO <sub>2</sub>                                 | Polyester foil                     | RuO <sub>2</sub> -graphite                                       | 51.2         | 606                 | N/A            | 2.0 – 10.0        | N/A              | N/A       | N/A               | N/A         | SCE <sup>3</sup>       | [4]               |
|                   |                                                  | Al <sub>2</sub> O <sub>3</sub>     | RuO <sub>2</sub>                                                 | 58.4         | 578                 | 0.995          | 2.0 – 12.0        | 14               | 22        | N/A               | 0.5         |                        | [5]               |
|                   |                                                  | Al <sub>2</sub> O <sub>3</sub>     | RuO <sub>2</sub> ·xH <sub>2</sub> O                              | 52.1         | 651                 | N/A            | 2.0 – 10.0        | 15               | 21 – 24   | N/A               | N/A         | Ag AgCl KCl            | [6]               |
|                   |                                                  | <b>Al<sub>2</sub>O<sub>3</sub></b> | <b>RuO<sub>2</sub></b>                                           | <b>61.8</b>  | <b>682</b>          | <b>0.996</b>   | <b>1.0 – 13.0</b> | <b>14</b>        | <b>22</b> | <b>4.6 – 24.9</b> | <b>0.15</b> |                        | <b>This study</b> |
|                   | RuO <sub>2</sub> -Ta <sub>2</sub> O <sub>5</sub> | Al <sub>2</sub> O <sub>3</sub>     | RuO <sub>2</sub> -glass <sup>4</sup>                             | 56.0         | N/A                 | N/A            | 2.0 – 12.0        | 120              | N/A       | N/A               | N/A         | Screen printed Ag/AgCl | [7]               |
|                   |                                                  | Al <sub>2</sub> O <sub>3</sub>     | RuO <sub>2</sub> , Ta <sub>2</sub> O <sub>5</sub> , glass powder | 68.2         | N/A                 | 0.987          | 2.0 – 12.0        | 15               | N/A       | 10                | N/A         | Screen printed Ag/AgCl | [7]               |
|                   |                                                  | Al <sub>2</sub> O <sub>3</sub>     | RuO <sub>2</sub> , Ta <sub>2</sub> O <sub>5</sub>                | 56           | N/A                 | N/A            | 2.0 – 12.0        | 15               | N/A       | N/A               | N/A         |                        | [8]               |
|                   |                                                  | Al <sub>2</sub> O <sub>3</sub>     | RuO <sub>2</sub> , SnO <sub>2</sub>                              | 56.5         | 631                 | 0.998          | 2.0 – 12.0        | 9                | N/A       | 7                 | N/A         |                        | [9]               |
|                   |                                                  | Al <sub>2</sub> O <sub>3</sub>     | RuO <sub>2</sub> , Cu <sub>2</sub> O                             | 47.4         | N/A                 | N/A            | 2.0 – 13.0        | N/A              | 21        | N/A               | N/A         |                        | [10]              |
|                   |                                                  | Al <sub>2</sub> O <sub>3</sub>     | RuO <sub>2</sub> , La <sub>2</sub> O <sub>3</sub>                | 49.3         | N/A                 | N/A            | 2.0 – 12.0        | N/A              | 19        | N/A               | N/A         | Ag AgCl KCl            | [11]              |
|                   |                                                  | Al <sub>2</sub> O <sub>3</sub>     | RuO <sub>2</sub> , TiO <sub>2</sub>                              | 56.6         | 630                 | 0.999          | 2.0 – 11.0        | 15               | N/A       | 5                 | N/A         |                        | [12]              |
|                   |                                                  | Al <sub>2</sub> O <sub>3</sub> -Pt | RuO <sub>2</sub>                                                 | 58.0         | 640                 | N/A            | 2.0 – 13.0        | 1-2              | 23        | ~ 0               | 1.5         |                        | [13]              |
|                   | RuO <sub>2</sub> -Nafion                         | Al <sub>2</sub> O <sub>3</sub>     | RuO <sub>2</sub>                                                 | 58.3         | 656                 | 0.999          | 2.0 – 12.0        | 42               | 22        | N/A               | 0.4         |                        | [5]               |
|                   | RuO <sub>2</sub> -Nafion                         | Al <sub>2</sub> O <sub>3</sub>     | RuO <sub>2</sub> -glass <sup>4</sup>                             | 58.6         | 684                 | 0.995          | 3.0 – 11.0        | N/A              | N/A       | 11.5 – 26         | N/A         |                        | [14]              |

| Deposition method | Electrode sensitive material                             | Substrate                      | Precursor                            | Slope, mV/pH | E <sup>0</sup> , mV | R <sup>2</sup> | pH range   | Response time, s | T, °C | Hysteresis, mV | Drift, mV/h | Reference electrode           | Ref. |
|-------------------|----------------------------------------------------------|--------------------------------|--------------------------------------|--------------|---------------------|----------------|------------|------------------|-------|----------------|-------------|-------------------------------|------|
| Sol-gel           | RuO <sub>2</sub> -CN                                     | Au, Co, steel                  | RuO <sub>2</sub> , CNT               | 63.1         | 647                 | 1.000          | 2.0 – 12.0 | 50               | N/A   | N/A            | N/A         | SCE                           | [15] |
| Pechini           | RuO <sub>2</sub> -TiO <sub>2</sub>                       | Ti                             | RuCl <sub>3</sub> , Ti               | 56.0         | N/A                 | 0.998          | 2.0 – 12.0 | N/A              | 25    | N/A            | N/A         |                               | [16] |
| RFMS <sup>5</sup> | RuO <sub>2</sub>                                         | Pt wire                        | RuO <sub>2</sub> -glass <sup>6</sup> | 60           | 913                 | N/A            | 2.0 – 12.0 | 90               | 25    | 30             | 3           | NHE                           | [17] |
|                   |                                                          | OMC <sup>7</sup>               | RuO <sub>2</sub>                     | 57.8         | 598                 | 0.999          | 2.0 – 12.0 | 180              | 22    | 3.14           | 19.0        | Ag AgCl KCl                   | [18] |
|                   |                                                          | OMC                            | RuO <sub>2</sub>                     | 58.4         | 670                 | 0.999          | 4.0 – 10.0 | 30               | 22    | 1.13           | 5.0         |                               | [19] |
|                   |                                                          | Carbon                         | RuO <sub>2</sub>                     | 59.2         | 800                 | 1.000          | 4.0 – 10.0 | 25               | 22    | 5.44           | 20.5        |                               | [19] |
|                   |                                                          | Pt                             | RuO <sub>2</sub>                     | 58.6         | 925                 | 0.999          | 4.0 – 10.0 | 20               | 22    | 6.45           | 23.4        |                               | [19] |
|                   |                                                          | Si                             | Ru                                   | 55.6         | N/A                 | N/A            | 1.0 – 13.0 | <1               | N/A   | 4.36           | 0.38        | SCE                           | [20] |
|                   |                                                          | Si                             | Ru                                   | 51.7         | N/A                 | 0.978          | 2.0 – 10.0 | N/A              | N/A   | N/A            | N/A         |                               | [21] |
|                   |                                                          | Si                             | RuO <sub>2</sub>                     | 55.8         | N/A                 | 0.998          | 2.0 – 10.0 | N/A              | N/A   | N/A            | N/A         | Ag AgCl KCl                   | [21] |
|                   |                                                          | Si                             | Ru                                   | 56.0         | N/A                 | N/A            | 1.0 - 12.0 | N/A              | N/A   | N/A            | N/A         |                               | [22] |
|                   |                                                          | Al <sub>2</sub> O <sub>3</sub> | RuO <sub>2</sub>                     | 73.8         | N/A                 | 0.998          | 4.0 - 10.0 | 3                | 22    | ~ 5            | N/A         | RuO <sub>2</sub> <sup>8</sup> | [23] |
|                   |                                                          | Al <sub>2</sub> O <sub>3</sub> | RuO <sub>2</sub>                     | 58.8         | N/A                 | 0.999          | 2.0 – 12.0 | 30               | 22    | 1.3            | 2.9         |                               | [24] |
|                   | RuO <sub>2</sub> -Ta <sub>2</sub> O <sub>5</sub> -Nafion | Al <sub>2</sub> O <sub>3</sub> | RuO <sub>2</sub>                     | 55.3         | 288                 | 1.000          | 2.0 – 12.0 | 136 (pH 6)       | 22    | 0.7            | 7.2         | RuO <sub>2</sub> <sup>8</sup> | [24] |
|                   | RuO <sub>2</sub> -CNT <sup>9</sup>                       | Ta                             | Ru, CNT                              | 55.5         | 643                 | 1.000          | 2.0 – 12.0 | 40               | 25    | 10.2           | ~ 3         | Ag AgCl KCl                   | [25] |

<sup>1</sup> ED – Electrodeposition

<sup>2</sup> NHE – Normal Hydrogen Electrode

<sup>3</sup> SCE – Saturated calomel electrode

<sup>4</sup> RuO<sub>2</sub>-glass paste with the resistivity of 10 kΩ/sq (3914, Electro-Science Laboratories, USA)

<sup>5</sup> RFMS – Radio-Frequency Magnetron Sputtering

<sup>6</sup> Submicron particles of RuO<sub>2</sub> and high lead silicate, or borosilicate, glass (typically containing 63-90% PbO, 10-25% SiO<sub>2</sub> and 0-25% B<sub>2</sub>O<sub>3</sub>, by weight) dispersed in a viscous organic liquid This study

<sup>7</sup> OMC - Ordered Mesoporous Carbon

<sup>8</sup> RuO<sub>2</sub>, acrylic well filled with PVB-SiO<sub>2</sub> junction material

<sup>9</sup> CNT – Carbon Nanotubes

**Table S2.** Change of the sensitivity of the fabricated electrodes with time

| Time,<br>days | Temperature, °<br>C | Theoretical<br>sensitivity,<br>mV/pH | Measured sensitivity, mV/pH |                       |                       |
|---------------|---------------------|--------------------------------------|-----------------------------|-----------------------|-----------------------|
|               |                     |                                      | RuO <sub>2</sub> -800       | RuO <sub>2</sub> -850 | RuO <sub>2</sub> -900 |
| 1             | 21                  | 58.3                                 | 61.8 ± 1.0                  | 60.5 ± 1.4            | 56.1 ± 2.1            |
| 3             | 21                  | 58.3                                 | 60.0 ± 1.5                  | 58.1 ± 0.4            | 59.4 ± 0.7            |
| 6             | 22                  | 58.5                                 | 58.3 ± 0.0                  | 59.5 ± 0.6            | 59.3 ± 0.0            |
| 7             | 22                  | 58.5                                 | 62.0 ± 0.1                  | 62.1 ± 0.6            | 59.8 ± 0.1            |
| 11            | 22                  | 58.5                                 | 60.6 ± 0.3                  | 58.5 ± 1.8            | 59.3 ± 1.8            |
| 14            | 24                  | 58.9                                 | 58.7 ± 0.3                  | 58.9 ± 0.3            | 62.2 ± 0.5            |

## References

- Pasztor, K.; Sekiguchi, A.; Shimo, N.; Kitamura, N.; Masuhara, H. Electrochemically-deposited RuO<sub>2</sub> films as pH sensors. *Sens. Actuators B Chem.* **1993**, *14*, 561–562, doi:10.1016/0925-4005(93)85091-n.
- Shim, J.H.; Kang, M.; Lee, Y.; Lee, C. A nanoporous ruthenium oxide framework for amperometric sensing of glucose and potentiometric sensing of pH. *Microchim. Acta* **2012**, *177*, 211–219, doi:10.1007/s00604-012-0774-9.
- Mingels, R.; Kalsi, S.; Cheong, Y.; Morgan, H. Iridium and Ruthenium oxide miniature pH sensors: Long-term performance. *Sens. Actuators B Chem.* **2019**, *297*, 126779, doi:10.1016/j.snb.2019.126779.
- Koncki, R.; Mascini, M. Screen-printed ruthenium dioxide electrodes for pH measurements. *Anal. Chim. Acta* **1997**, *351*, 143–149, doi:10.1016/s0003-2670(97)00367-x.
- Uppuluri, K.; Lazouskaya, M.; Szwagierczak, D.; Zaraska, K. Influence of temperature on the performance of Nafion coated RuO<sub>2</sub> based pH electrodes. In Proceedings of the 2021 IEEE International Conference on Flexible and Printable Sensors and Systems (FLEPS), Manchester, UK, 20–23 June 2021; pp. 1–4.
- Mihell, J.; Atkinson, J. Planar thick-film pH electrodes based on ruthenium dioxide hydrate. *Sens. Actuators B Chem.* **1998**, *48*, 505–511, doi:10.1016/s0925-4005(98)00090-2.
- Manjakkal, L.; Synkiewicz, B.; Zaraska, K.; Cvejín, K.; Kulawik, J.; Szwagierczak, D. Development and characterization of miniaturized LTCC pH sensors with RuO<sub>2</sub> based sensing electrodes. *Sens. Actuators B Chem.* **2016**, *223*, 641–649, doi:10.1016/j.snb.2015.09.135.
- Manjakkal, L.; Cvejín, K.; Kulawik, J.; Zaraska, K.; Socha, R.P.; Szwagierczak, D. X-ray photoelectron spectroscopic and electrochemical impedance spectroscopic analysis of RuO<sub>2</sub>-Ta<sub>2</sub>O<sub>5</sub> thick film pH sensors. *Anal. Chim. Acta* **2016**, *931*, 47–56, doi:10.1016/j.aca.2016.05.012.
- Manjakkal, L.; Cvejín, K.; Kulawik, J.; Zaraska, K.; Szwagierczak, D.; Stojanovic, G. Sensing mechanism of RuO<sub>2</sub>-SnO<sub>2</sub> thick film pH sensors studied by potentiometric method and electrochemical impedance spectroscopy. *J. Electroanal. Chem.* **2015**, *759*, 82–90, doi:10.1016/j.jelechem.2015.10.036.
- Zhuiykov, S.; Kats, E.; Marney, D.; Kalantar-Zadeh, K. Improved antifouling resistance of electrochemical water quality sensors based on Cu<sub>2</sub>O-doped RuO<sub>2</sub> sensing electrode. *Prog. Org. Coat.* **2011**, *70*, 67–73, doi:10.1016/j.porgcoat.2010.10.003.
- Zhuiykov, S.; Kats, E.; Marney, D.; Kalantar-Zadeh, K. Improved antifouling resistance of electrochemical water quality sensors based on Cu<sub>2</sub>O-doped RuO<sub>2</sub> sensing electrode. *Prog. Org. Coat.* **2011**, *70*, 67–73, doi:10.1016/j.porgcoat.2010.10.003.
- Manjakkal, L.; Cvejín, K.; Kulawik, J.; Zaraska, K.; Szwagierczak, D.; Socha, R.P. Fabrication of thick film sensitive RuO<sub>2</sub>-TiO<sub>2</sub> and Ag/AgCl/KCl reference electrodes and their application for pH measurements. *Sens. Actuators B Chem.* **2014**, *204*, 57–67, doi:10.1016/j.snb.2014.07.067.
- Zhuiykov, S. Morphology of Pt-doped nanofabricated RuO<sub>2</sub> sensing electrodes and their properties in water quality monitoring sensors. *Sens. Actuators B Chem.* **2009**, *136*, 248–256, doi:10.1016/j.snb.2008.10.030.
- Lazouskaya, M.; Tamm, M.; Scheler, O.; Uppuluri, K.; Zaraska, K. Nafion as a protective membrane for screen-printed pH-sensitive ruthenium oxide electrodes. In Proceedings of the 2020 17th Biennial Baltic Electronics Conference (BEC), Tallinn, Estonia, 6–8 October 2020; pp. 1–4.
- Kahram, M.; Asnavandi, M.; Dolati, A. Synthesis and electrochemical characterization of sol-gel-derived RuO<sub>2</sub>/carbon nanotube composites. *J. Solid State Electrochem.* **2013**, *18*, 993–1003, doi:10.1007/s10008-013-2346-2.
- Pocriška, L.; Gonçalves, C.; Grossi, P.; Colpa, P.; Pereira, E. Development of RuO<sub>2</sub>-TiO<sub>2</sub> (70–30)mol% for pH measurements. *Sens. Actuators B Chem.* **2006**, *113*, 1012–1016, doi:10.1016/j.snb.2005.03.087.
- McMurray, H.; Douglas, P.; Abbot, D. Novel thick-film pH sensors based on ruthenium dioxide-glass composites. *Sens. Actuators B Chem.* **1995**, *28*, 9–15, doi:10.1016/0925-4005(94)01536-q.
- Lonsdale, W.; Wajrak, M.; Alameh, K. Effect of conditioning protocol, redox species and material thickness on the pH sensitivity and hysteresis of sputtered RuO<sub>2</sub> electrodes. *Sens. Actuators B Chem.* **2017**, *252*, 251–256, doi:10.1016/j.snb.2017.05.171.

19. Lonsdale, W.; Maurya, D.; Wajrak, M.; Alameh, K. Effect of ordered mesoporous carbon contact layer on the sensing performance of sputtered RuO<sub>2</sub> thin film pH sensor. *Talanta* **2017**, *164*, 52–56, doi:10.1016/j.talanta.2016.11.020.
20. Liao, Y.-H.; Chou, J.-C. Preparation and characteristics of ruthenium dioxide for pH array sensors with real-time measurement system. *Sens. Actuators B Chem.* **2008**, *128*, 603–612, doi:10.1016/j.snb.2007.07.023.
21. Yao, X.; Vepsäläinen, M.; Isa, F.; Martin, P.; Munroe, P.; Bendavid, A. Advanced RuO<sub>2</sub> Thin Films for pH Sensing Application. *Sensors* **2020**, *20*, 6432, doi:10.3390/s20226432.
22. Chou, J.-C.; Liu, S.-I.; Chen, S.-H. Sensing Characteristics of Ruthenium Films Fabricated by Radio Frequency Sputtering. *Jpn. J. Appl. Phys.* **2005**, *44*, 1403–1408, doi:10.1143/jjap.44.1403.
23. Sardarinejad, A.; Maurya, D.K.; Alameh, K. The pH Sensing Properties of RF Sputtered RuO<sub>2</sub> Thin-Film Prepared Using Different Ar/O<sub>2</sub> Flow Ratio. *Materials* **2015**, *8*, 3352–3363, doi:10.3390/ma8063352.
24. Lonsdale, W.; Wajrak, M.; Alameh, K. Manufacture and application of RuO<sub>2</sub> solid-state metal-oxide pH sensor to common beverages. *Talanta* **2018**, *180*, 277–281, doi:10.1016/j.talanta.2017.12.070.
25. Xu, B.; Zhang, W.-D. Modification of vertically aligned carbon nanotubes with RuO<sub>2</sub> for a solid-state pH sensor. *Electrochim. Acta* **2010**, *55*, 2859–2864, doi:10.1016/j.electacta.2009.12.099.
